# Supplementary material
Source: Springer Nature journal article supplement (https://www.springermedizin.de/resource/supplementary/13075_2011_3500_MOESM5_ESM.pdf/9694670)

## MKK7

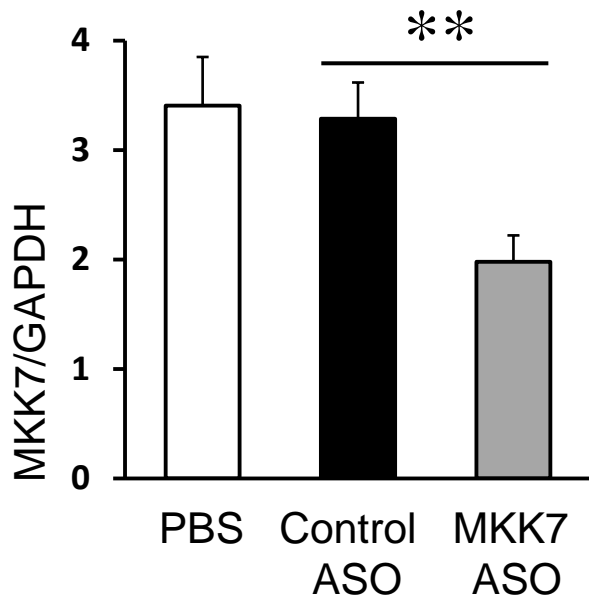

## IL-1 $\beta$

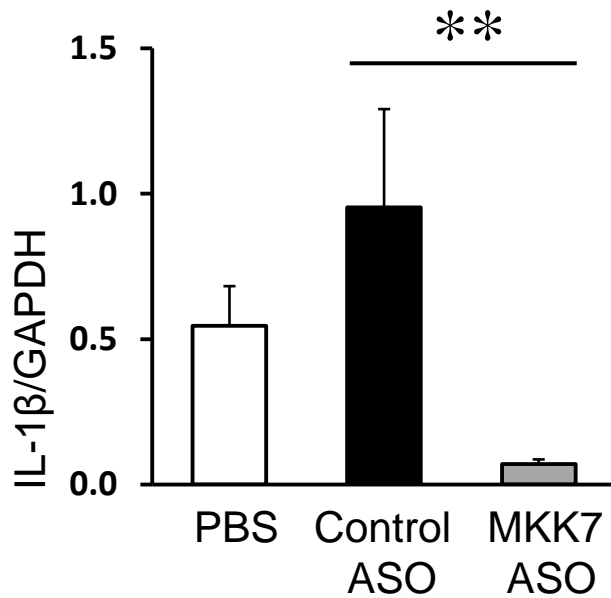

## MMP3

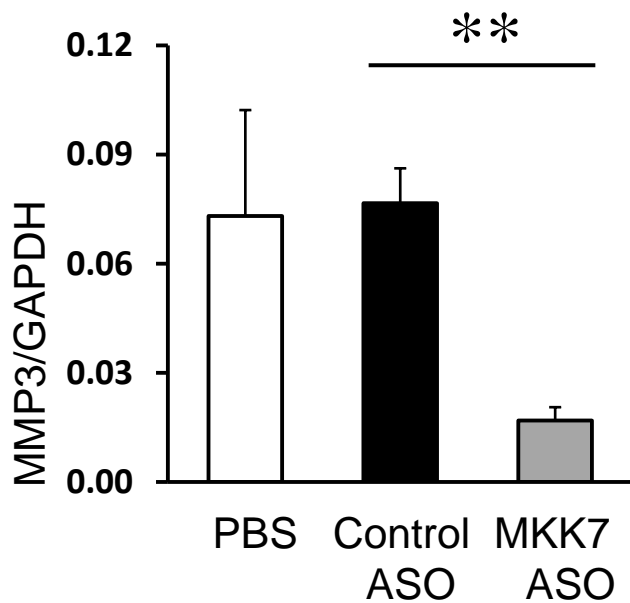

## MMP13

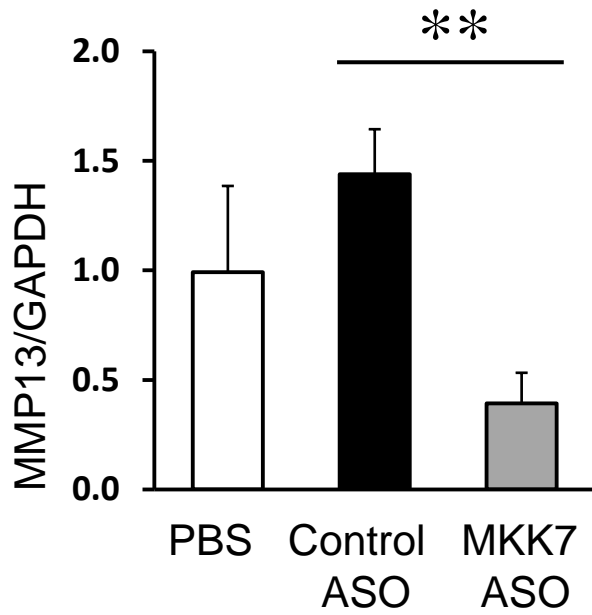

Supplement: MOESM5 [file 9694670]
